## ERRATUM

### A Comparison of Propofol- and Dexmedetomidine-induced Electroencephalogram Dynamics Using Spectral and Coherence Analysis: Erratum

In the article beginning on page 978 of the November 2014 issue, one of the authors' names was listed incorrectly (reversed) in the author byline. The correct presentation should have been as follows: Lei Gao, M.D.

#### Reference

Akeju O, Pavone KJ, Westover MB, Vazquez R, Prerau MJ, Harrell PG, Hartnack KE, Rhee J, Sampson AL, Habeeb K, Lei G, Pierce ET, Walsh JL, Brown EN, Purdon PL: A comparison of propofol- and dexmedetomidine-induced electroencephalogram dynamics using spectral and coherence analysis. *ANESTHESIOLOGY* 2014; 121:978–89

## ERRATUM

### Renal Effects of Saline-based 10% Pentastarch *versus* 6% Tetrastarch Infusion in Ovine Endotoxemic Shock: Erratum

In the article beginning on page 936 of the April 2010 issue, figure 5 erroneously depicts liver instead of kidney histology, because images were confused during the submission process. The following images show the respective histologic changes of the kidney, which should have been included.

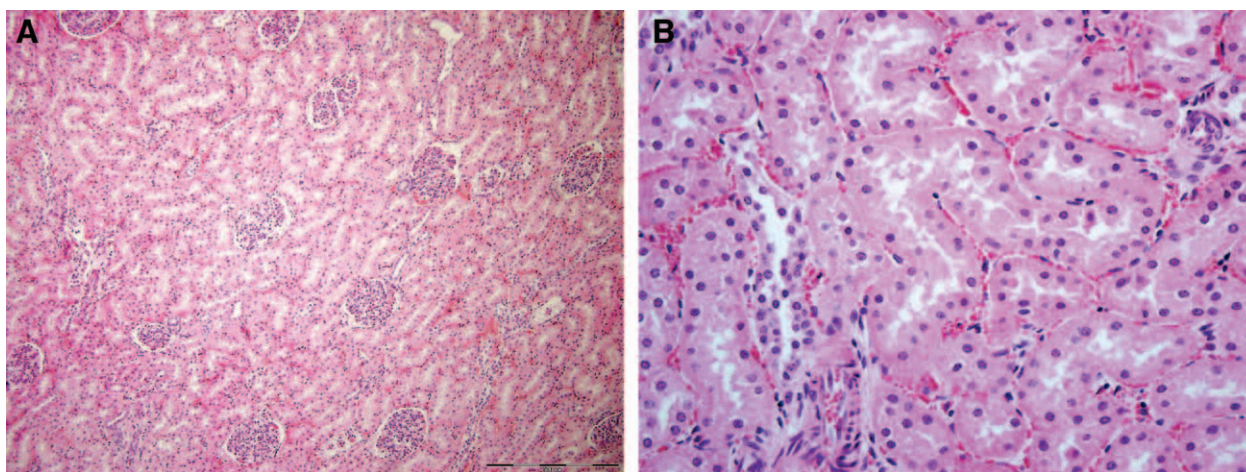

**Fig. 5.** Histologic changes of the kidney. (A) 100-fold magnification; (B) 400-fold magnification.

#### Reference

Ertmer C, Köhler G, Rehberg S, Morelli A, Lange M, Ellger B, Pinto BB, Rübiger E, Erren M, Fischer LG, Van Aken H, Westphal M: Renal effects of saline-based 10% pentastarch *versus* 6% tetrastarch infusion in ovine endotoxemic shock. *ANESTHESIOLOGY* 2010; 112:936–47
